# Supplementary material for: Compared arsenic removal from aqueous solutions by synthetic mixed oxides and modified natural zeolites
Source: Springer Nature journal article supplement (doi:10.1007/s10450-019-00109-2), 2019-05-09
Supplement: MOESM1 [file 10450_2019_109_MOESM1_ESM.pdf]

## Supplementary material for ADSORPTION

### Compared arsenic removal from aqueous solutions by synthetic mixed oxides and modified natural zeolites

Angélica Heredia<sup>a\*</sup>, Jenny Gómez Avila<sup>a</sup>, Ariel Vinuesa<sup>a</sup>, Clara Saux<sup>a</sup>, Sandra M. Mendoza<sup>b</sup>, Fernando Garay<sup>c</sup>, Mónica Crivello<sup>a</sup>.

<sup>a</sup> CITEQ-CONICET, Universidad Tecnológica Nacional, Facultad Regional Córdoba, Maestro Marcelo López esq. Cruz Roja Argentina, Ciudad Universitaria, X5016ZAA, Córdoba, Argentina

<sup>b</sup> Universidad Tecnológica Nacional, CONICET, Facultad Regional Reconquista, Reconquista, Argentina

<sup>c</sup> INFIQC-CONICET, Departamento de Físico Química, Facultad de Ciencias Químicas, Universidad Nacional de Córdoba. Pabellón Argentina, Ciudad Universitaria. X5000HUA Córdoba, Argentina

[\\*angelicaheredia@gmail.com](mailto:angelicaheredia@gmail.com)

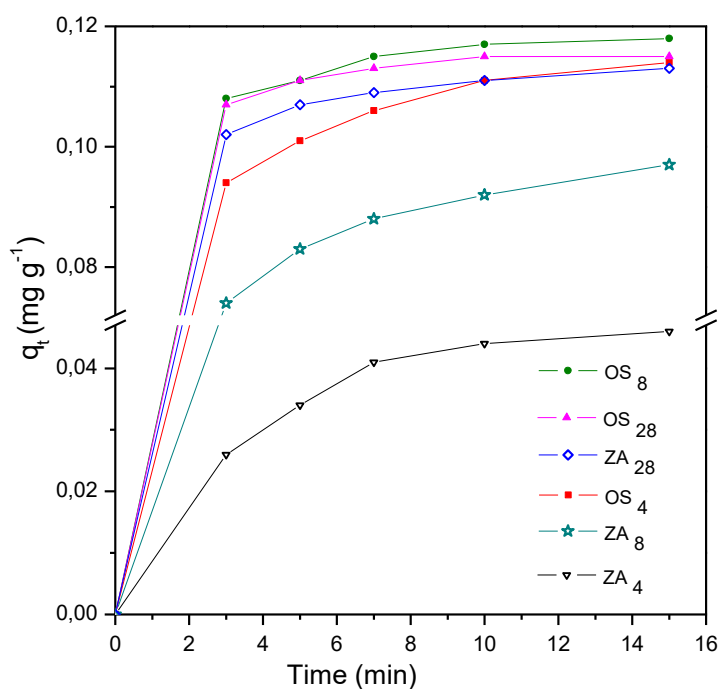

Figure 1: Time dependence of As(III) adsorption capacity.  $C_0 = 170 \mu\text{g L}^{-1}$  of As(III). Adsorbent dose:  $1.42 \text{ g L}^{-1}$ .

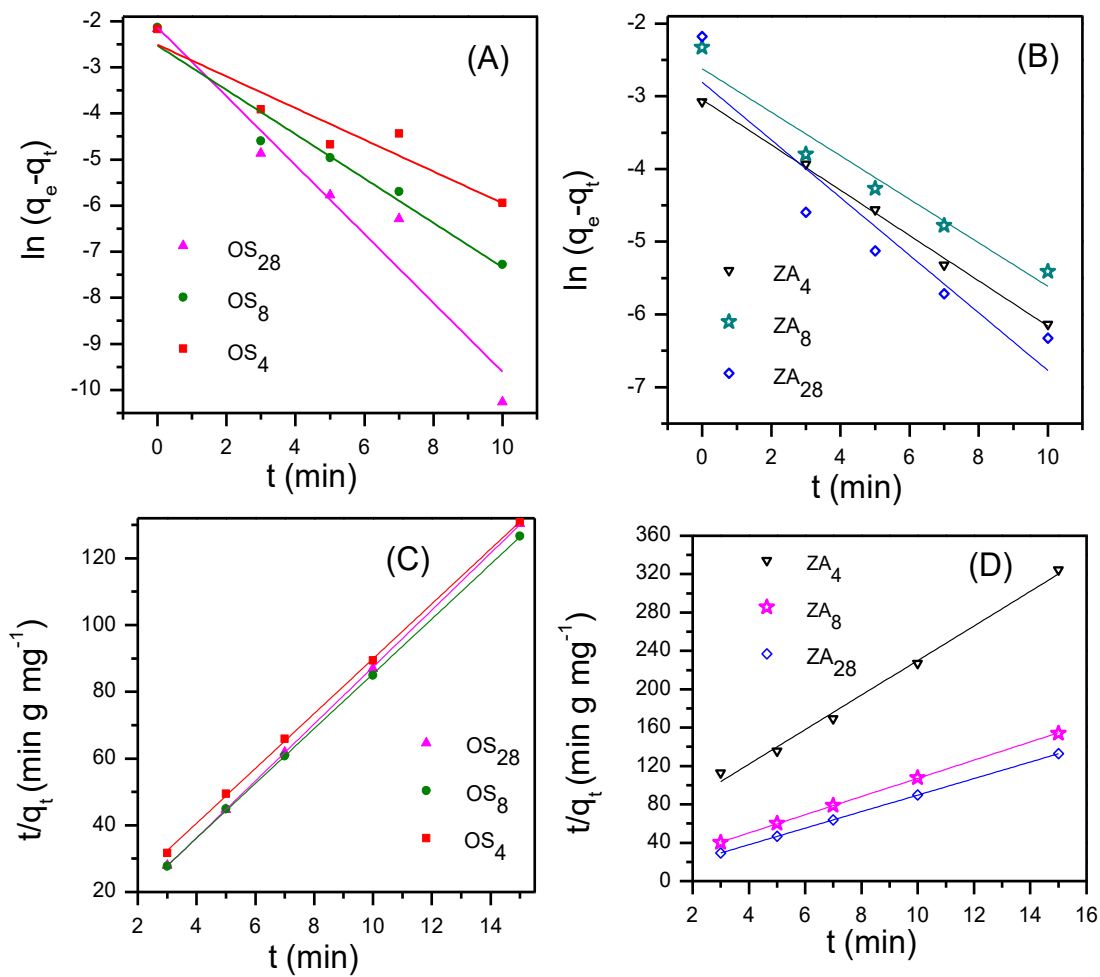

Figure 2: The Pseudo first (A, B) and Pseudo second (C, D) order kinetic models.

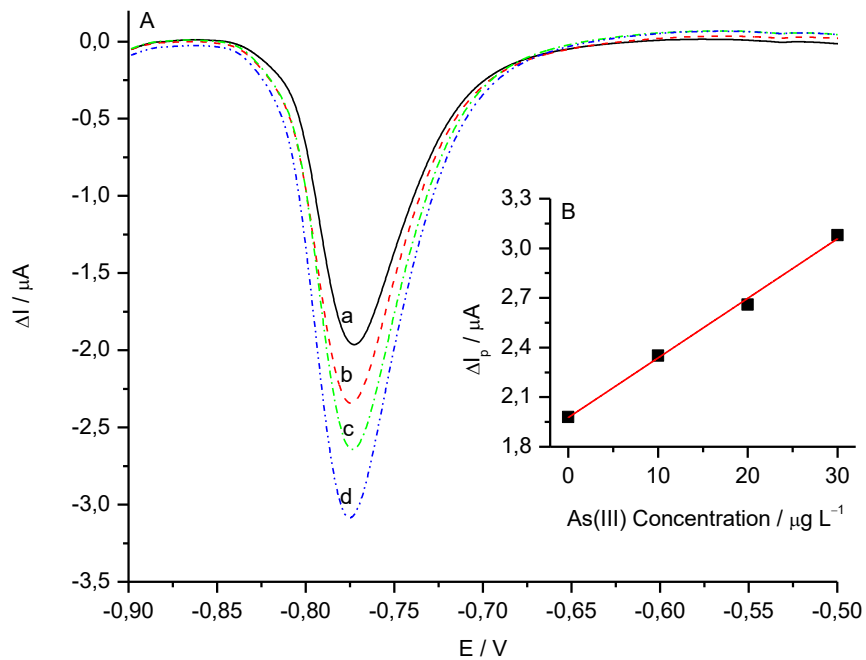

Figure 3. (A) Experimental differential current ( $\Delta I$ ) corresponding to CS-SWV of As(III) after: (a) exposing 70 mL of a solution with  $170 \mu\text{g L}^{-1}$  of As(III) to 0.1g of ZA<sub>4</sub>. Curves (b), (c) and (d) are standard additions of As(III) =  $10 \mu\text{g L}^{-1}$ . Other parameters are 1 M HCl,  $f = 100 \text{ Hz}$ ,  $E_{\text{sw}} = 50 \text{ mV}$ ,  $dE = 5 \text{ mV}$ ,  $t_{\text{ac}} = 20 \text{ s}$ , and  $E_{\text{ac}} = -0.4 \text{ V}$ . (B) Dependence of  $\Delta I_p$  on the concentration of As(III).

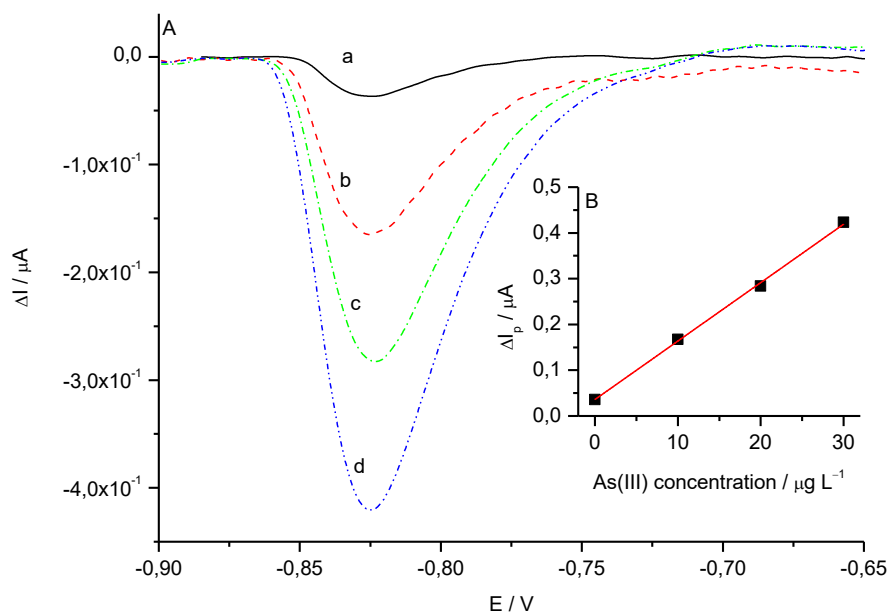

Figure 4. (A) Experimental differential current ( $\Delta I$ ) corresponding to CS-SWV of As(III) after: (a) exposing 70 mL of a solution with  $170 \mu\text{g L}^{-1}$  of As(III) to 0.1g of OS<sub>4</sub>. Curves (b), (c) and (d) are standard additions of As(III) =  $10 \mu\text{g L}^{-1}$ . Other parameters are 1 M HCl,  $f = 100 \text{ Hz}$ ,  $E_{\text{sw}} = 50 \text{ mV}$ ,  $dE = 5 \text{ mV}$ ,  $t_{\text{ac}} = 20 \text{ s}$ , and  $E_{\text{ac}} = -0.4 \text{ V}$ . (B) Dependence of  $\Delta I_p$  on the concentration of As(III).
